# Supplementary material
Source: MDPI journal article supplement (https://www.mdpi.com/2071-1050/13/9/5179)

---

## Drivers and Barriers on Implementing Regenerative Sustainable Buildings/Districts

This survey aims to gather information about the benefits and challenges that are commonly considered during the Regenerative building/district implementation process in Europe in order to identify Drivers and Barriers faced

This survey serves the research undertaken by several European professionals of COST Action CA16114 RESTORE (REthinking Sustainability TOwards a Regenerative Economy), financed by European Commission

### 1.

**Name of the project \***

**Country of origin \***

EASTERN EUROPE (Belarus, Bulgaria, Czech Republic, Hungary, Israel, Poland, Moldova, Romania, Russia, Slovakia, Ukraine)

NORTHERN EUROPE (Aland Islands, Denmark, Estonia, Faroe Islands, Finland, Guernsey, Iceland, Ireland, Isle of Man, Jersey, Latvia, Lithuania, Norway, Sark, Svalbard and Jan Mayen, Sweden, United Kingdom)

SOUTHERN EUROPE (Albania, Andorra, Bosnia and Herzegovina, Croatia, Cyprus, Gibraltar, Greece, Italy, Kosovo, FYR Macedonia, Malta, Montenegro, Portugal, San Marino, Serbia, Slovenia, Spain, Vatican City)

WESTERN EUROPE (Austria, Belgium, France, Germany, Liechtenstein, Luxembourg, Monaco, Netherlands, Switzerland, UK)

Other:

**Which is/was your stakeholders' role in the project? \***

Owner

Investor

Developer

Architect

Project manager

Auditor/Assesor

External Professional Energy Advisor

External Professional Sustainability Advisor

Other

## 2. Implementing Regenerative Sustainability Principles

This section aims to gather the information regarding the process of implementing Regenerative principles, stakeholders involvement in decision making, Benefits and Challenges considered

**How would you rate the implementation level of the following REGENERATIVE Sustainability Principles (explanation provided below in brackets) in your innovative project? (1-Low Level of Implementation, 5-High Level of Implementation) \***

Nature / Eco System (place-based design approach with the aim of regenerating the ecosystem and enabling to evolve in the future)

Energy (effective use and sharing of renewable, restorative and regenerative energy systems, energy as part of a coherent restoration approach)

Carbon (decreasing Carbon Emission, carbon-neutral approaches)

Water Management (reduce “water footprint”, preserve natural water cycles, water treatment and reuse, access to clean drinking water)

Regenerative Materials (improve material and resource “cycles”, life cycle assessment, healthy materials, maintain resources for future generations)

Waste Management (zero waste approach)

Health and Well-Being (enhance individual, community, and society health and well-being for all without exploiting other people, the environment, or future generations, reconnect human with nature (salutogenesis, biophilia, access to healthy food etc.)

Social Equity (equality and empowerment of people and countries, fairness in allocating resources, inclusiveness, supporting vulnerable people, participation)

Economy (regenerative -, circular- and sharing economy, sustainable production and consumption, collaborative, place-based economies at multiple scales)

Culture and Community (address the social determinants of health, foster social cohesion, community identity and empowerment, foster accessibility and integration)

Education and Inspiration (enable and encourage participation, bottom-up cultures and initiatives (permaculture, urban gardening, placemaking etc.) education for eco-literacy, increase awareness)

Mobility (reduce CO2 emissions caused by travel and transport, encourage walking and cycling, walkable cities, rural-urban balance)

If you have considered additional Sustainable Principles not involved in the table above, please mention them below

**How would you rate the level of importance of the following MARKETING/SALES and ECONOMICAL Principles during the implementation of your innovative project? (1-Less Important, 5-Very Important) \***

Increased Building/District Awareness  
Increased Building/District Sales  
Improve Company Image  
Build Users Trust  
Receive Project Awards  
Decrease Construction Cost  
Decrease Maintenance Cost  
Lower Property Taxes  
Available Public Funds  
Project Certification  
Construction Standards

If you have considered additional MARKETING/SALES and ECONOMICAL Principles not involved in the table above, please mention them below



**To what level have the following factors been considered as a challenge while deciding to go for Regenerative Sustainability Principles Implementation? (1-Low, 5-High) \***

Increased Construction Cost  
Lack of Employees Knowledge on Regenerative Materials/Technology...  
Lack of Contractors Knowledge on Regenerative Materials/Technology...  
Longer Construction Process  
Lack of Legislation  
Lack of Professional Advice  
Complexity of Project Organisation (many stakeholders involved or stakeholders located in different countries)  
Prolonged Construction Time

If you have considered other/additional challenges not involved in the table above, please mention them below



**Which of the projects' stakeholders were inspiring / significantly involved in the decision making process of implementing the regenerative principles \***

Owner  
Investor  
Architect  
Project Manager  
Construction Company  
External Professional Energy Advisor  
External Professional Sustainability Advisor  
Assessor/Auditor  
Other:

### **3.**

General Information

This section aims to gather the general information regarding the DRIVERS and BARRIERS faced after completion and recommendations for future projects

**In your opinion, would you please mention the overall added value of your project?**



**Would you please explain in simple figures (% or monetary value) the benefits you are having after the project is finalised (energy saved, water saved, costs reduced..)**

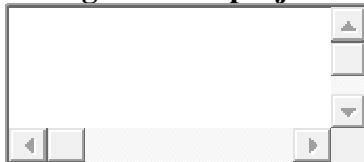

**Would you please explain in simple figures (% or monetary value) the challenges you are having after the project is finalised (costs increased, difficulties in building maintenance..)**

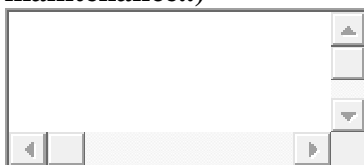

**Would you please provide your valuable recommendations for an easier implementation of Regenerative Sustainability Principles in future Projects (ex. Legislation, Awareness, Education, Fundings, etc .) \***



Supplement: s1 [file s1]
